## **IL-13 deficiency exacerbates lung damage and impairs epithelial-derived type 2 molecules during nematode infection**

5

AL Chenery<sup>\*1,2</sup>, S Rosini<sup>\*1,2</sup>, JE Parkinson<sup>1,2</sup>, JA Herrera<sup>1</sup>, Craig Lawless<sup>1</sup>, BHK Chan<sup>1,2</sup>, P Loke<sup>3</sup>, AS MacDonald<sup>2</sup>, KE Kadler<sup>1</sup>, TE Sutherland<sup>†2</sup> and JE Allen<sup>†1,2</sup>

10

Judith E. Allen

[judi.allen@manchester.ac.uk](mailto:judi.allen@manchester.ac.uk)

The University of Manchester, AV Hill Building, Oxford Road, Manchester, M13 9PT, United Kingdom.

15 Tel: +44 161 306 1347

Tara E. Sutherland

[tara.sutherland@manchester.ac.uk](mailto:tara.sutherland@manchester.ac.uk)

The University of Manchester, Core Technology Facility, Grafton St, Manchester, M13 9NT United Kingdom.

20

Tel: +44 161 306 6052

25

<sup>1</sup> Wellcome Centre for Cell-Matrix Research, Faculty of Biology, Medicine & Health, Manchester Academic Health Science Centre, University of Manchester, Manchester, United Kingdom.

30

<sup>2</sup> Lydia Becker Institute for Immunology & Infection, Faculty of Biology, Medicine & Health, Manchester Academic Health Science Centre, University of Manchester, Manchester, UK.

<sup>3</sup> Laboratory of Parasitic Diseases, National Institute of Allergy and Infectious Diseases, National Institutes of Health, Bethesda, MD, USA.

35

\* These authors contributed equally.

† Joint communicating authors

The authors declare no conflicts of interest.

## Abstract

IL-13 plays a key role during protective type 2 immune responses at mucosal sites,  
40 such as during infection with nematodes. However, dysregulation of IL-13 can also  
contribute to the pathogenesis of atopic and fibrotic diseases such as allergic asthma. Matrix  
remodelling is an important component of repair processes in the lung but also a hallmark of  
chronic conditions involving fibrosis. Hence, understanding the role of IL-13 in tissue  
remodelling has important clinical implications. Since IL-13 shares receptors and signalling  
45 pathways with IL-4, disentangling the relative contributions of these type 2 cytokines has  
been challenging. Additionally, little is known about the singular role of IL-13 following  
acute tissue injury. In this study, we used *Nippostrongylus brasiliensis* infection as a model  
of acute lung tissue damage comparing responses between WT and IL-13-deficient mice, in  
which IL-4 signalling is intact. Importantly, we found that IL-13 played a critical role in  
50 limiting tissue injury and haemorrhaging in the lung following infection. Through proteomic  
and transcriptomic profiling, we identified IL-13-dependent changes in matrix and associated  
regulators. We further showed that IL-13 is required for the induction of epithelial-derived  
type 2 effector molecules such as RELM- $\alpha$  and surfactant protein D. Pathway analyses  
predicted that IL-13 was heavily involved in the induction of cellular stress responses and  
55 regulation of lung epithelial cell differentiation by suppression of Foxa2 pathways. Thus, we  
propose that IL-13 has tissue-protective functions during lung injury and regulates epithelial  
cell responses during type 2 immunity in this acute setting.

## Introduction

60 IL-13 is a central effector cytokine with diverse roles during both protective and pathogenic type 2 immune responses. During anti-parasitic immunity, IL-13 is critical for goblet cell hyperplasia and mucus production at mucosal sites (1). These responses are particularly essential for the expulsion of gastrointestinal worms from the host (2). However, the same mucus hypersecretion response is a hallmark of pathogenicity in asthmatic patients  
65 (3). Similarly, IL-13 can induce cytoprotective cytokines such as vascular endothelial growth factor to protect from acute lung injury (4), yet drive airway smooth muscle cell contraction leading to broncho-constrictive effects during asthma pathogenesis (5). However, IL-13 and IL-4 have overlapping signalling pathways and both utilize IL-4R $\alpha$ . IL-4 signals through the type I receptor (IL-4R $\alpha$  paired with the common  $\gamma$  chain) and the type II receptor (IL-4R $\alpha$   
70 paired with IL-13R $\alpha$ 1) whereas IL-13 only signals through the type II receptor. However, IL-13 can also ligate IL-13R $\alpha$ 2, which serves primarily as a non-signalling decoy receptor but may have signalling functions distinct from IL-13R $\alpha$ 1 (6, 7). Consequently, disentangling the relative roles of each cytokine in specific cell types has been challenging (8). Whilst IL-13 has been a therapeutic target for asthma with ongoing clinical trials (9), dupilumab, anti-IL-  
75 4R $\alpha$  which inhibits both IL-4 and IL-13 signalling, has been a front-runner treatment showing efficacy in severe asthma patients (10). Thus, understanding the individual roles of these two cytokines has important clinical implications.

Collagen deposition following tissue injury is an important aspect of wound healing and repair. However, in asthma and other chronic inflammatory conditions, dysregulated  
80 extracellular matrix (ECM) remodelling and fibrosis leads to many pathological features of disease, with increased deposition of collagen and basement membrane thickening leading to a significant decline in airway function (11, 12). In such disease settings, a pro-fibrotic role for IL-13 is evidenced by its ability to activate pulmonary fibroblasts and stimulate fibrillar

collagen synthesis (13–16). Further, the role of IL-13 in promoting liver fibrosis, such as  
85 during schistosomiasis and other pathologies, is well-characterised (6, 17, 18). However,  
there is an apparent context-dependent role for IL-13 in promoting pulmonary fibrosis. For  
instance, IL-13 is required for fibrotic changes in the lung following *Schistosoma mansoni*  
egg challenge but not in the bleomycin model of pulmonary fibrosis (19). While these studies  
implicate IL-13 in regulating ECM components such as fibrous collagens during a variety of  
90 chronic inflammatory conditions, less is known about how IL-13 may affect the ECM and  
associated regulators as a whole and in acute contexts of lung injury.

In this study, we examined the function of IL-13 during the early stages of infection  
with the lung-migrating nematode parasite *Nippostrongylus brasiliensis*. We found that IL-13  
was required for the full induction of airway eosinophilia and for limiting lung injury,  
95 independent from the other type 2 cytokines IL-4 and IL-5. IL-13 did not have a major effect  
on collagen dynamics during the early phase of infection. However, IL-13 was critical for the  
upregulation of type 2 effector molecules involved in collagen regulation and tissue repair,  
such as epithelial-derived resistin-like molecule alpha (RELM- $\alpha$ ). Through both proteomic  
and transcriptomic approaches, we provide new insight into the contribution of IL-13 to  
100 pulmonary helminth infections, in particular suggesting a broader role for IL-13 in overall  
type 2 immunity during acute lung injury.

## Results

### Lung injury and vascular damage is exacerbated in the absence of IL-13

105            Upon infection in the skin with the nematode parasite *N. brasiliensis*, larvae migrate into the circulation and by day 2 post-infection (D2pi) burst through the lung capillaries and the airways causing extensive tissue damage and haemorrhaging (20). To evaluate the role of IL-13 we used *Il13<sup>tm3.1Anjm</sup>* (IL-13 eGFP knock-in) mice, which are deficient for IL-13 when bred as homozygotes (henceforth referred to as *Il13<sup>-/-</sup>*). Following infection of *Il13<sup>-/-</sup>*, we

110 assessed acute bleeding as well the cumulative clearance of blood (**Figure 1A**). We first measured the bronchoalveolar lavage (BAL) fluid absorbance at 540 nm, which correlates with the increased presence of haemoglobin due to bleeding (21). In the absence of IL-13, infected mice had an increased level of airway haemorrhage on D2pi relative to WT mice (**Figure 1A**). Efferocytosis of red blood cells has been shown to occur in the *N. brasiliensis*

115 model (22). Therefore, as an additional measure of bleeding, we assessed the accumulated uptake of red blood cells over time by measurement of haemosiderin within airway macrophages. Consistent with exaggerated bleeding, infected *Il13<sup>-/-</sup>* mice had increased numbers of haemosiderin-laden macrophages in the lung compared to controls, as determined by Prussian blue staining on D6pi (**Figure 1A**). To assess airway damage following infection,

120 we evaluated H&E-stained lung sections with lacunarity analysis to determine gaps in alveolar structures (23). By D2pi, *Il13<sup>-/-</sup>* mice had increased lacunarity scores relative to WT (**Figure 1B**). Upon gross inspection of lung sections from D2pi, it was evident that infected *Il13<sup>-/-</sup>* lungs had larger gaps in the alveoli, presumably in areas proximal to where larvae burst through the tissue (**Figure 1C**). However, by D6pi lacunarity was comparable between

125 *Il13<sup>-/-</sup>* and WT mice (**Figure 1B**). These data strongly suggest an early host tissue-protective role for IL-13 in partially limiting airway haemorrhaging and tissue damage immediately after *N. brasiliensis* entry into the lung.

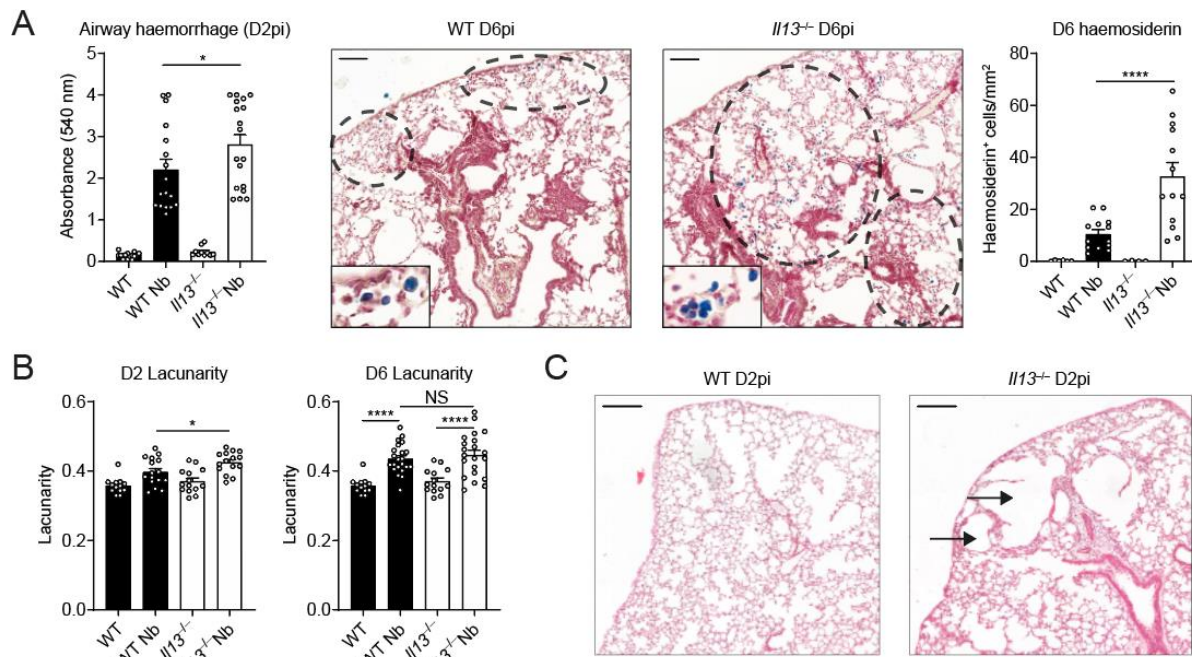

**Figure 1** Tissue-protective role for IL-13 during acute lung injury. WT and *Il13*<sup>-/-</sup> mice were infected with *N. brasiliensis* (Nb). (A) On D2pi, BAL fluid absorbance at 540 nm was quantified to measure airway haemorrhage. On D6pi, lung lobe sections were stained with Prussian blue and haemosiderin-laden cells (blue) were enumerated per area of tissue (scale bar = 100  $\mu$ m). (B) To measure airway damage on D2pi and D6pi, lacunarity for whole lung lobes was computed. (C) Representative haematoxylin and eosin images of infected WT and *Il13*<sup>-/-</sup> lungs showing alveolar damage in the tissue (scale bar = 200  $\mu$ m). Data (mean  $\pm$  SEM) were pooled from 3 individual experiments with 3-6 mice per group (per experiment). NS not significant, \* $P$ <0.05, \*\*\*\* $P$ <0.0001 (one-way ANOVA and Tukey-Kramer *post hoc* test).

## IL-13 is required for airway eosinophilia during *N. brasiliensis* infection

Neutrophilia is a major contributor to acute lung injury and haemorrhage during helminth infection (24). At D2pi, neutrophils are the predominant infiltrating granulocyte and contribute to worm killing but at the expense of host tissue injury (24, 25). We hypothesised that the exacerbated bleeding and damage in *Il13*<sup>-/-</sup> mice was due to the requirement for IL-13 to suppress the early neutrophilia. Thus, we aimed to characterise the role of IL-13 during the early granulocyte response in the lungs. Using *N. brasiliensis* infection of *Il13*<sup>-/-</sup> mice, we found that the proportion of infiltrating neutrophils in the BAL was not significantly altered in the absence of IL-13 when compared to infected WT mice on D2pi (Figure 2A). In terms of absolute numbers, *Il13*<sup>-/-</sup> mice only exhibited a slight trend for increased neutrophils compared to controls on D2pi and D4pi (Figure 2B). Between D4-6pi the parasite larvae have exited the lungs, en route to the small intestine and the granulocyte

150 response shifts towards eosinophilia in the airways. As early as D4pi, *Il13*<sup>-/-</sup> mice had a major reduction in the proportion and number of eosinophils in the BAL relative to infected WT mice and this response was sustained at D6pi (**Figure 2A, 2C**). This major reduction in eosinophil proportions in infected *Il13*<sup>-/-</sup> mice accounted for the apparent increase in neutrophil percentage at D4pi and D6pi. Together, these results show that IL-13 is required

155 for the full induction of airway eosinophilia following *N. brasiliensis* infection.

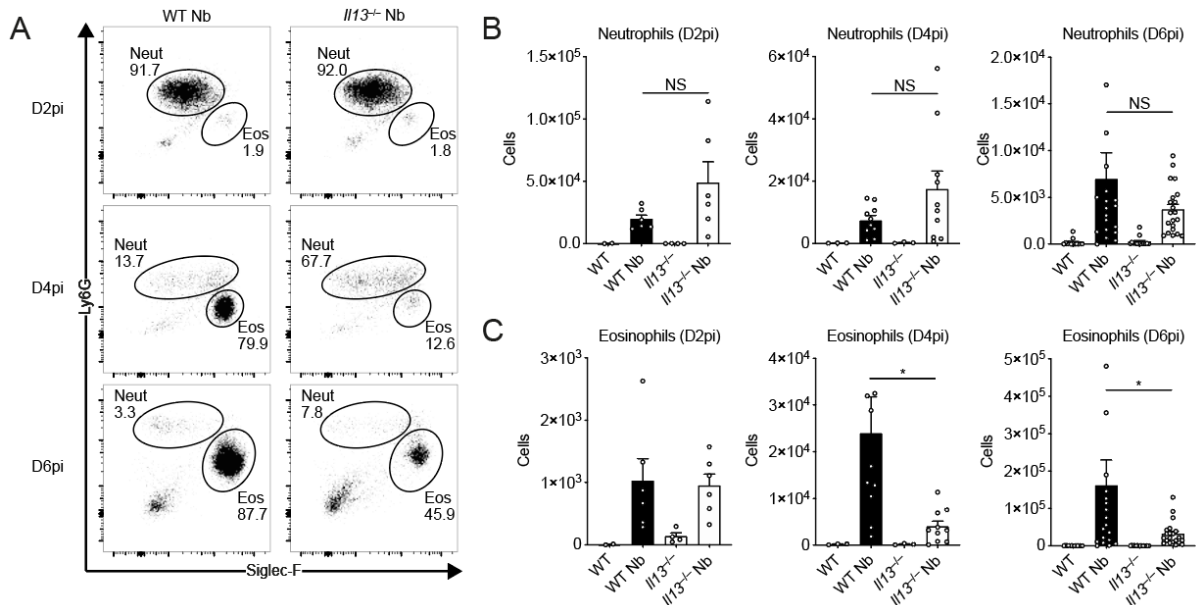

**Figure 2** IL-13-dependent airway eosinophilia during *N. brasiliensis* infection. WT and *Il13*<sup>-/-</sup> mice were infected with *N. brasiliensis* (Nb) and BAL cells were analysed by flow cytometry. (A) Representative plots of percentages of BAL CD11c<sup>-</sup>CD11b<sup>+</sup>Ly6G<sup>+</sup> neutrophils and CD11c<sup>-</sup>CD11b<sup>+</sup>Siglec-F<sup>+</sup> eosinophils on D2, D4, and D6pi. Numbers indicate percentage of cells within total live CD45.2+ cells. (B) Total BAL neutrophil and (C) eosinophil cell counts on D2, D4, and D6pi. Data (mean ± SEM) were representative (D2pi) or pooled (D4 and D6pi) from 4 individual experiments with 3-5 mice per group (per experiment). NS not significant, \**P*<0.05 (one-way ANOVA and Tukey-Kramer *post hoc* test).

165

#### IL-4 and IL-5 do not compensate in the absence of IL-13 after *N. brasiliensis* infection

Previous studies using the *N. brasiliensis* model in IL-4R $\alpha$ -deficient animals or IL-4/IL-13-double-deficient mice did not distinguish between the relative roles of IL-4 and IL-13 during infection (26–28). Unlike those settings, in IL-13 cytokine-deficient mice which

170 have intact type I and II IL-4 receptors, IL-4 may compensate for IL-13-deficiency. To evaluate the potential role of IL-4, we first assessed overall susceptibility to *N. brasiliensis* in

the small intestine which is known to be dependent on both IL-4R $\alpha$  and IL-13R $\alpha$ 1 (i.e. type I and II IL-4 receptors) (26, 29). Where WT mice had largely cleared their parasites, all *Il13*<sup>-/-</sup> mice harboured adult intestinal worms on D6pi (**Figure 3A**). However, IL-13 can play a role  
175 in the differentiation of Th2 cells (30) and it was therefore possible that increased worm burden in IL-13 deficient mice was due to impaired Th2 cell activation following infection. We therefore assessed lung CD4<sup>+</sup> T cells on D6pi by ex-vivo stimulation and measurement of intracellular type 2 cytokine expression. We confirmed that lung CD4<sup>+</sup> T cells in our *Il13*<sup>-/-</sup> mouse strain expressed eGFP in lieu of functional IL-13 after infection with *N. brasiliensis*  
180 when compared to controls (**Figure 3B**). Importantly, in the absence of IL-13 expression, neither IL-4 nor IL-5 cytokine expression was changed in CD4<sup>+</sup> T cells following infection (**Figure 3C**). Furthermore, measurement of type 2 cytokine mRNA from whole lung also showed no change in the expression of *Il4* and *Il5* between infected *Il13*<sup>-/-</sup> and WT mice (**Figure 3D**). Thus, IL-13 cytokine-deficient mice become fully susceptible to *N. brasiliensis*  
185 infection with no evidence that altered susceptibility is due to reduced IL-4/IL-5 during the adaptive type 2 response.

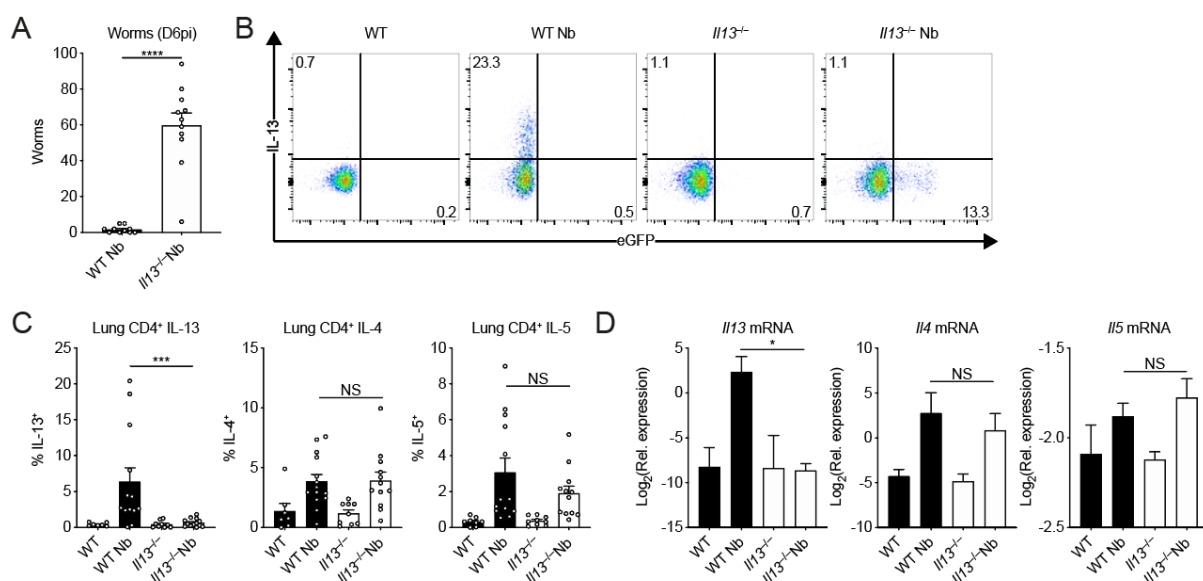

190 **Figure 3** IL-4 and IL-5 do not compensate in the absence of IL-13 during *N. brasiliensis* infection. WT and *Il13*<sup>-/-</sup> mice were infected with *N. brasiliensis* (Nb). (A) On D6pi, adult worms in the small intestine were quantified. (B) Representative flow cytometry plots of lung CD4<sup>+</sup> T cells stimulated ex vivo to measure



intracellular WT IL-13 and KO eGFP expression. (C) Percentages of CD4<sup>+</sup> T cells expressing IL-13, IL-4, and IL-5. (D) Whole lung *Il13*, *Il4*, and *Il5* mRNA was measured by quantitative real-time PCR (data normalised against housekeeping gene *Rpl13a*). Data (mean  $\pm$  SEM) were pooled from 3 individual experiments with 3-5 mice per group (per experiment). NS not significant, \* $P < 0.05$ , \*\*\* $P < 0.001$ , \*\*\*\* $P < 0.0001$  (one-way ANOVA and Tukey-Kramer *post hoc* test).

### Lung proteomic analysis following *N. brasiliensis* infection

Our results thus far showed that IL-13 has a role in limiting lung injury and enabling eosinophil recruitment into the airways following *N. brasiliensis* infection. Whilst gross changes in lung structure were not evident at day 6 between WT and *Il13*<sup>-/-</sup> mice (Figure 1C), it is feasible that changes to physical lung injury in the absence of IL-13, as was seen on D2 post-infection (Figure 1B & 1C), could have profound effects on the way in which the lung repairs compared to WT animals. To directly address this possibility at the whole tissue level, we performed mass spectrometry on H&E-stained lung sections at D6pi. In infected WT mice, 648 proteins were significantly changed (adjusted  $P$  value  $< 0.05$ ) relative to uninfected mice with most of these proteins being upregulated (Figure 4A). We then specifically analysed changes in the ECM and matrix-related proteins (defined from the Matrisome Project (31)), performing hierarchical clustering across groups after *N. brasiliensis* infection (Figure 4B). Several collagen types (notably collagens I, III, and VI) clustered together, with proteins reduced in WT mice after infection, an effect not replicated in *Il13*<sup>-/-</sup> mice. Such differences may relate to an already lower level of expression of these collagens under basal conditions in *Il13*<sup>-/-</sup> vs. WT mice. Evaluation of the relative abundance of collagen types across groups confirmed dysregulated collagen levels in the absence of IL-13, with *N. brasiliensis* infection altering collagen expression in WT but not *Il13*<sup>-/-</sup> mice (Figure 4C). Fibrillar collagens I and III, while already low in *Il13*<sup>-/-</sup> mice, were decreased in infected WT mice and basement membrane-associated collagens IV and VI were also dysregulated in *Il13*<sup>-/-</sup> mice. To visualise total collagen deposition, Masson's trichrome staining was performed but did not show any major differences between infected WT and

220 *Il13*<sup>-/-</sup> mice at D6pi (**Figure S1**). Further, hydroxyproline levels were measured as a proxy  
for total collagen in the lung and confirmed no gross differences between the groups (**Figure**  
**S1**). To gain further insight into global IL-13-dependent changes in the lung, we performed  
pathway analysis on differentially expressed proteins (by non-adjusted *P* value < 0.05)  
comparing infected WT and *Il13*<sup>-/-</sup> mice (**Figure 4D**). IL-13-dependent canonical pathway  
225 analysis showed a downregulation (blue) in pathways relating to protein synthesis and  
cellular stress after infection, with 71% of endoplasmic reticulum stress pathway-associated  
proteins being regulated by IL-13. Additionally, mTOR signalling and antigen presentation  
pathways appeared to be altered in the absence of IL-13. Whilst proteomic analysis of lungs  
from infected *Il13*<sup>-/-</sup> mice did not reveal any differences in matrisome components compared  
230 to infected WT mice, RELM- $\alpha$  and surfactant protein D (SP-D), two proteins heavily  
implicated in type 2 immunity (32, 33), were significantly decreased in infected *Il13*<sup>-/-</sup> lungs  
amongst the total proteome (**Figure S2**). Several other key proteins were found to be  
significantly downregulated in *Il13*<sup>-/-</sup> mice based on relative abundance when compared to  
infected WT mice including AMCcase, BRP39, and Ym1 (**Figure 4E**) molecules also strongly  
235 associated with pulmonary type 2 immunity (25, 34). These data suggest that IL-13 may not  
directly regulate ECM remodelling following acute lung injury on D6pi following *N.*  
*brasiliensis* infection. However, IL-13 is critical for the induction of type 2 effector  
molecules which may determine the subsequent tissue repair responses.

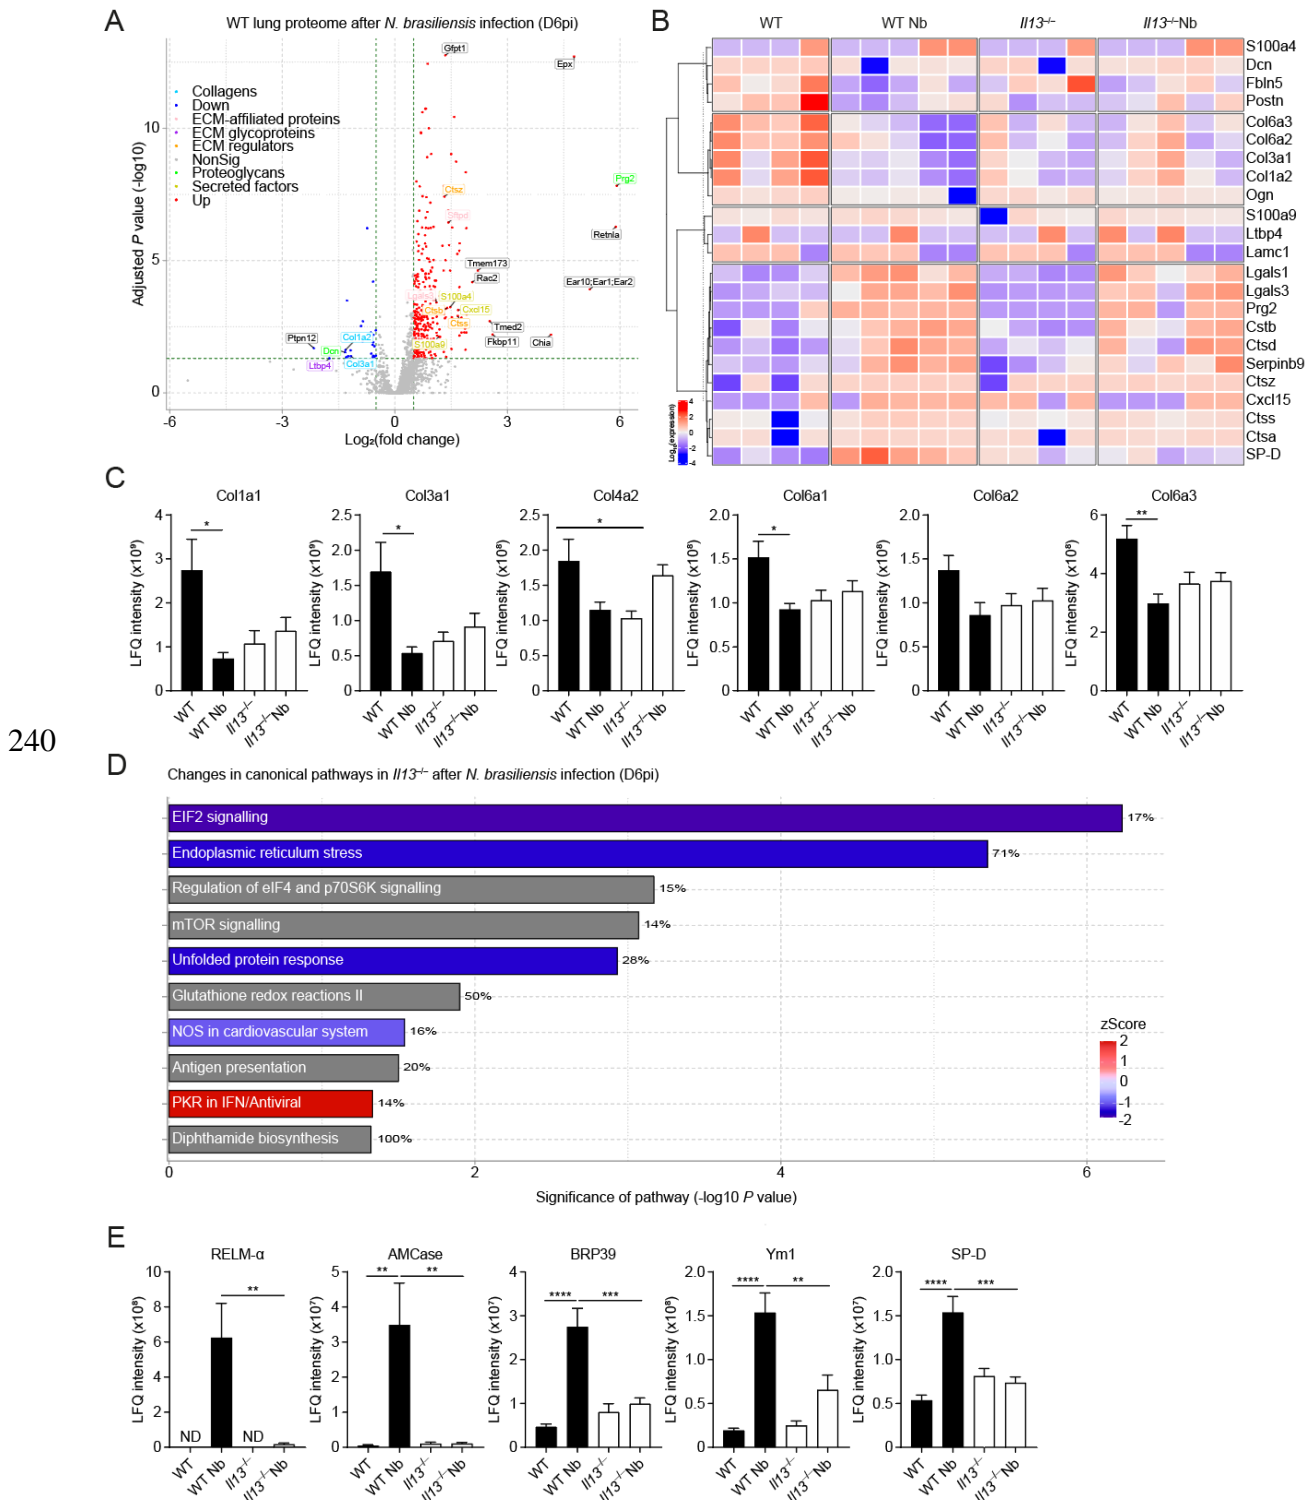

**Figure 4** IL-13-dependent lung proteomic changes during *N. brasiliensis* infection. WT and *I113*<sup>-/-</sup> mice were infected with *N. brasiliensis* (Nb) and on D6pi lungs were prepared for proteomic analysis. (A) Volcano plot of infected WT lungs (D6pi) showing differential expression of up- (red) or down- (blue) regulated proteins with matrisome annotations (fold change relative to naïve WT mice). Black labels indicate proteins lacking matrisome annotations. (B) Unsupervised, hierarchically clustered heatmap of expression of matrisome proteins comparing naïve and Nb-infected groups of WT and *I113*<sup>-/-</sup> mice on D6pi. Columns in each set represent different (biological repeat) mice in each group (C) Relative abundance (LFQ intensity) of collagen peptides comparing infected WT and *I113*<sup>-/-</sup> lungs on D6pi. (D) Predicted changes in canonical pathways based on changes in the proteome of infected *I113*<sup>-/-</sup> mice compared to infected WT mice (downregulation in blue, upregulation in red, and no specified direction in grey). Percentage indicates the relative number of proteins that are regulated in each pathway. (E) Relative abundance of peptides highly associated with type 2 immunity

255 comparing infected WT and *Il13*<sup>-/-</sup> lungs on D6pi. Data (mean ± SEM in **C** and **E**) are pooled from 2 independent mass spectrometry runs with 4-5 mice per group in total. \**P*<0.05, \*\**P*<0.01, \*\*\**P*<0.001, \*\*\*\**P*<0.0001 (one-way ANOVA and Tukey-Kramer *post hoc* test).

### **IL-13 is required for induction of epithelial cell-derived RELM- $\alpha$**

The proteomic analysis led us to further characterise the contribution of IL-13 to RELM- $\alpha$  expression in the lung. RELM- $\alpha$  is an important type 2-associated effector molecule implicated in repair processes that have been previously described in the skin and lungs (35, 36). We measured RELM- $\alpha$  protein in the BAL fluid by ELISA (i.e. release into the airways) and consistent with our proteomics data found decreased RELM- $\alpha$  levels in *Il13*<sup>-/-</sup> mice infected with *N. brasiliensis* relative to infected WT mice (**Figure 5A**). Similarly, quantification of mRNA in the whole lung showed that the induction of *Retnla* expression on D4pi and D6pi was reduced in the absence of IL-13 (**Figure 5B**). In addition, we performed immunofluorescence staining in lung sections and found that the airways, which were highly RELM- $\alpha$ <sup>+</sup> following infection in WT mice, appeared largely diminished in RELM- $\alpha$  expression in infected *Il13*<sup>-/-</sup> mice (**Figure 5C**). To directly quantify this cellular RELM- $\alpha$  expression, lung cell suspensions were analysed by flow cytometry for intracellular RELM- $\alpha$ . In the absence of IL-13, CD45<sup>-</sup>EpCAM<sup>+</sup> epithelial cells had significantly impaired expression of RELM- $\alpha$  as early as D2pi and was still muted by D6pi when compared to WT controls (**Figure 5D**). Consistent with previous findings (36, 37), epithelial cells were the major source of RELM- $\alpha$  at these time points whilst other cellular sources such as alveolar macrophages, neutrophils, and eosinophils, were relatively unchanged in the absence of IL-13 following infection (data not shown). As a complementary experiment, equimolar amounts of systemic IL-4 and IL-13 were each delivered by intraperitoneal injection into WT mice and 18 h later epithelial RELM- $\alpha$  expression was measured in the lungs. In contrast to IL-4 which had no apparent effect, systemic IL-13

260

270

delivery was able to potently drive RELM- $\alpha$  expression in CD45<sup>-</sup>EpCAM<sup>+</sup> epithelial cells  
 280 (Figure 5E). However, we hypothesized that the differences in response to comparable doses  
 of IL-4 vs. IL-13 may be due to bioavailability in the lung when delivered systemically.  
 Therefore, we directly administered the cytokines to the lung via intranasal instillation and  
 found that both IL-4 and IL-13 induced epithelial cell derived-RELM- $\alpha$  (Figure 5F). Taken  
 together, these results show that IL-13 is both necessary and sufficient to stimulate lung  
 285 epithelial cell RELM- $\alpha$  and suggest that lung epithelial cells may be more sensitive to IL-13  
 relative to IL-4.

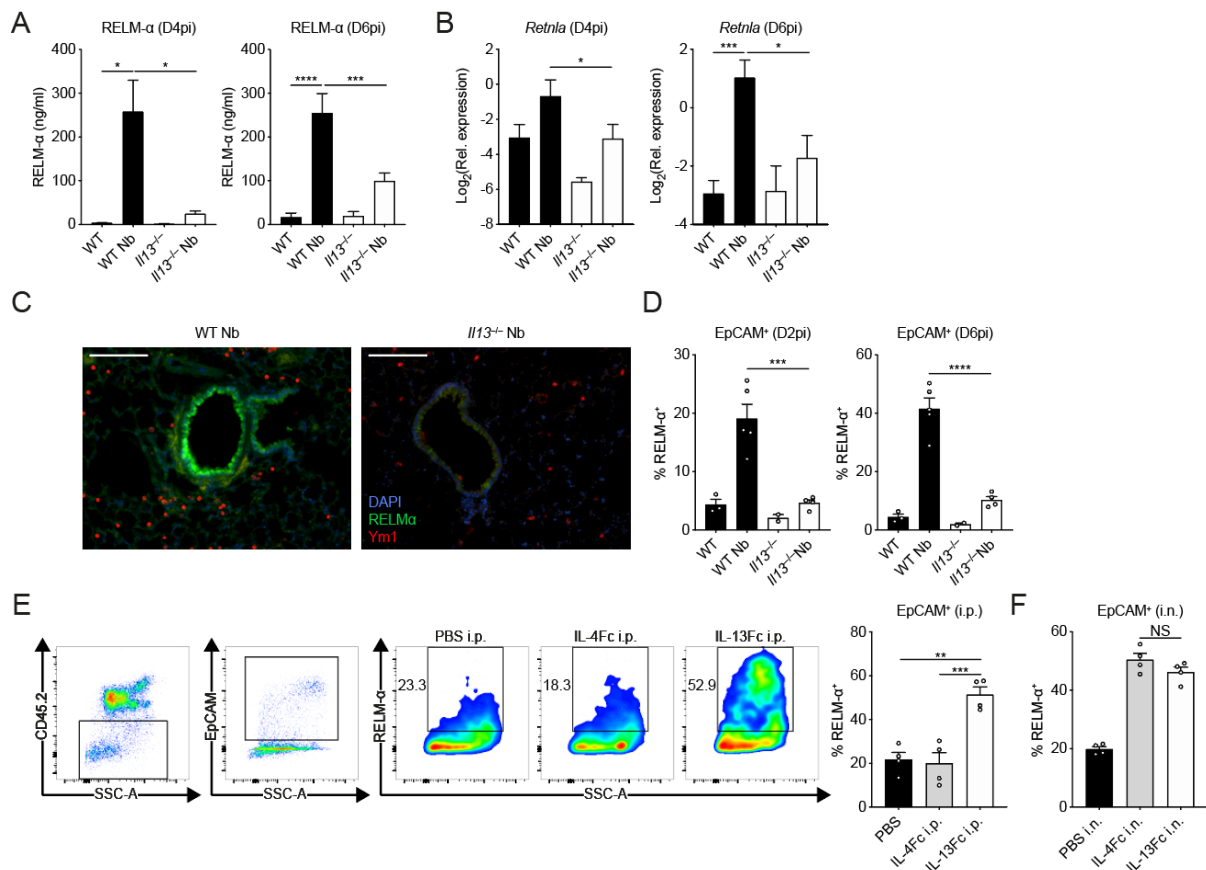

290 **Figure 5** Lung epithelial cell expression and airway release of RELM- $\alpha$  is IL-13 dependent. WT and *Il13*<sup>-/-</sup>  
 mice were infected with *N. brasiliensis* (Nb). (A) On D4 and D6pi RELM- $\alpha$  protein levels in the BAL fluid  
 were measured by ELISA. (B) D4 and D6pi whole lung *Retnla* mRNA was measured by quantitative real-time  
 PCR (data normalised against housekeeping gene *Rpl13a*). (C) Lung RELM- $\alpha$  (green) and Ym1 (red) were  
 295 imaged by immunofluorescence microscopy (scale bar = 100  $\mu$ m). (D) On D2 and D6pi, CD45<sup>-</sup>EpCAM<sup>+</sup> lung  
 epithelial cells were analysed and quantified by flow cytometry to measure intracellular RELM- $\alpha$ . (E) WT mice  
 were injected with either PBS, IL-4Fc, or IL-13Fc i.p. or (F) i.n. and 18 h later, CD45<sup>-</sup>EpCAM<sup>+</sup> lung epithelial  
 cell RELM- $\alpha$  expression was measured by flow cytometry. Data (mean  $\pm$  SEM) in A-B were pooled from 3  
 individual experiments with 3-5 mice per group (per experiment). Data (mean  $\pm$  SEM) in C-F were

300 representative of 2 individual experiments with 2-5 mice per group (per experiment). NS not significant, \* $P < 0.05$ , \*\* $P < 0.01$ , \*\*\* $P < 0.001$ , \*\*\*\* $P < 0.0001$  (one-way ANOVA and Tukey-Kramer *post hoc* test).

### **IL-13 broadly regulates type 2 immunity in the lung during *N. brasiliensis* infection**

Due to the technical limitations of proteomics not being able to detect low molecular weight cytokines and chemokines, we performed transcriptional profiling of lung tissue from  
305 *N. brasiliensis*-infected WT and *Il13*<sup>-/-</sup> mice to better define the role of IL-13 during type 2 immunity in acute injury settings and to highlight potential mechanisms/pathways involved. Using the Nanostring Myeloid Innate Immunity v2 panel, we screened for differentially regulated genes across groups on D6pi. Principal component analysis showed distinct separation between groups based on infection status (PC1) and genotype (PC2) (**Figure 6A**).  
310 Genes were grouped by unsupervised hierarchical clustering and differentially expressed genes were represented as a heatmap to identify expression patterns across all groups (**Figure 6B**). Notably, various signature type 2 genes were downregulated in infected *Il13*<sup>-/-</sup> mice such as *Chil3/4*, *Arg1*, *Il33*, *Retnla*, and the eotaxins (encoded by *Ccl11* and *Ccl24*). Conversely, a cluster of pro-inflammatory genes that included *Mmp8*, *Il18*, and *Tlr2* were  
315 upregulated in infected IL-13-deficient mice (**Figure 6B**). Differentially expressed genes were further characterised using Ingenuity Pathway Analysis to identify potential upstream regulators (**Figure 6C**). Very few regulators were predicted to be upregulated during IL-13 deficiency but included the airway epithelial cell-associated *Foxa2* (38) as well as the adenosine A1 receptor, *Adora1*. In summary, these data demonstrate a broad role for IL-13 in  
320 regulating type 2 immunity and epithelial cell function during acute helminth infection in the lung.

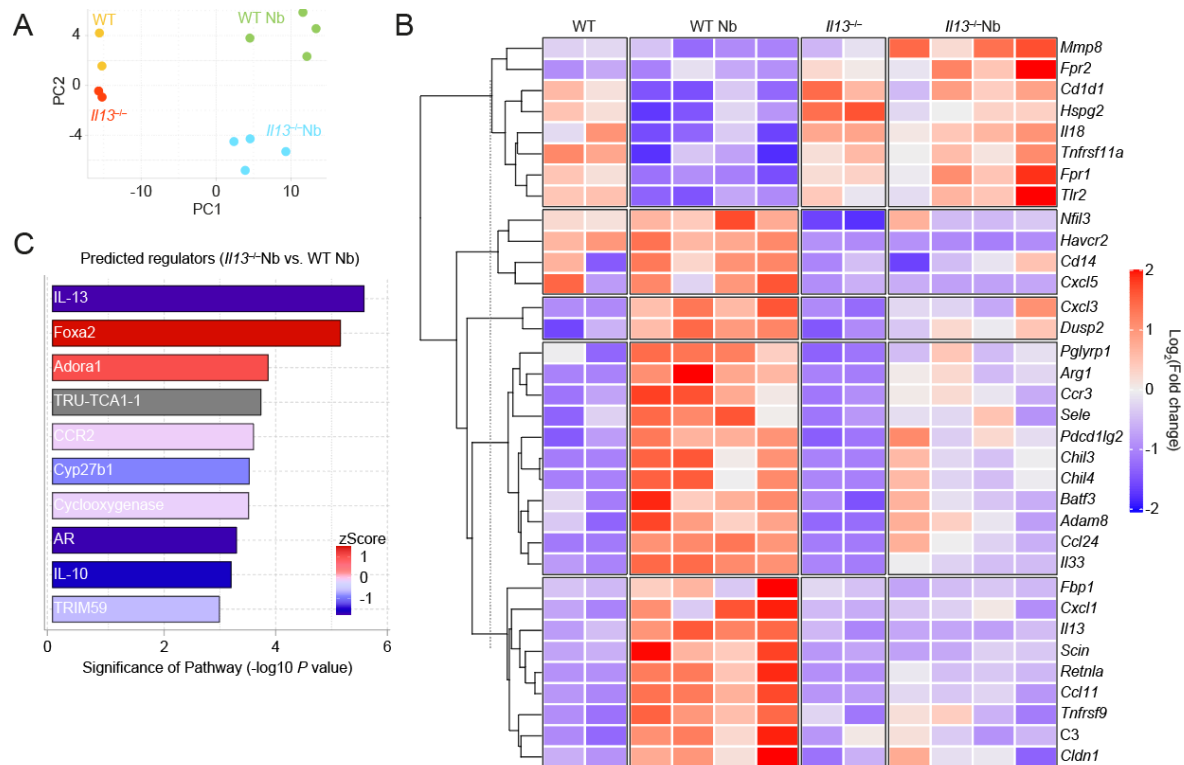

**Figure 6** Transcriptional profiling of IL-13-dependent genes in the lung after *N. brasiliensis* infection. Whole lung RNA from WT and *Il13*<sup>-/-</sup> mice infected with *N. brasiliensis* (Nb) on D6pi was analysed by Nanostring. (A) Principle components (PC) analysis of naïve and infected WT and *Il13*<sup>-/-</sup> mice. (B) Unsupervised, hierarchically clustered heatmap of genes differentially expressed between mouse groups with fold change expression level indicated by colour. Columns in each set represent different (biological repeat) mice in each group (C) Predicted upstream regulators from Ingenuity Pathway Analysis. Data are from a single Nanostring run with samples from 2-4 mice per group.

325

330

## Discussion

Despite sharing receptors/signalling components with IL-4, various studies have established a distinct role for IL-13 during type 2 immunity and argued against simple functional redundancy between these two cytokines. For example, IL-4 cytokine-deficient mice, but not IL-4R $\alpha$ -deficient mice, are able to expel *N. brasiliensis* from the gut due to intact IL-13 signalling (29). In addition, IL-13-deficient mice fail to clear *N. brasiliensis* parasites from the gut when compared to IL-4-deficient and WT mice (39). Whilst these studies establish a clear role for IL-13 in mediating type 2 immunity in the small intestine and the establishment of the adaptive immune response, very little is known about the functions of IL-13 in the earlier lung stage of this infection model. Our study reinforces these earlier findings but also reveal a crucial protective role for IL-13 in limiting acute lung injury, promoting airway eosinophilia, and inducing type 2 effector proteins. These lung-specific effects of IL-13 are also consistent with other work showing that pulmonary eosinophilia is impaired in IL-13R $\alpha$ 1-deficient mice during asthma (40, 41).

Our data demonstrates a profound epithelial cell-specific effect of IL-13 during acute lung injury with *N. brasiliensis*. Expression of the type I and type II IL-4 receptors is restricted based on cell type. Hematopoietic cells predominantly express the type I receptor while non-hematopoietic cells such as epithelial cells primarily express the type II receptor (42). While the type II receptor can be ligated by both IL-4 and IL-13, IL-13 can outcompete IL-4 by more efficiently promoting receptor assembly (43). In terms of epithelial cell expression, a model of mechanical injury shows that IL-13R $\alpha$ 1 expression increases at the wound edge in cultured alveolar epithelial cells (44). As we observed exacerbated airway injury in *Il13*<sup>-/-</sup> mice, it is therefore plausible in our model of nematode-induced lung injury that early alveolar epithelial cell function is dependent on the presence of IL-13. Our study also highlights impaired expression of type 2 effector molecules RELM- $\alpha$  and SP-D by lung



epithelial cells in the absence of IL-13. RELM- $\alpha$  is an IL-4R $\alpha$ -dependent protein involved in lung tissue repair and has been shown to mediate collagen crosslinking via lysyl hydroxylase 2 (32, 35). Interestingly, SP-D has known roles in promoting immunity to *N. brasiliensis* and is required for the upregulation of RELM- $\alpha$  in the lung (33). Further, our transcriptional  
360 profiling predicted a dysregulation of the transcription factor Foxa2 in the absence of IL-13 after infection. Foxa2 is required for alveolarization and negatively regulates goblet cell hyperplasia (38). In terms of type 2 function, the predicted increased Foxa2 activity in *Il13*<sup>-/-</sup> mice is consistent with previous studies showing that IL-13 decreases Foxa2 expression to enable mucin production by airway epithelial cells (45–47). We therefore hypothesize a  
365 mechanism of IL-13-mediated suppression of Foxa2 in alveolar epithelial cells that enables the expression and release of type 2 effector molecules such as RELM- $\alpha$ . It is also notable that MMP-8 and IL-18 were upregulated in infected *Il13*<sup>-/-</sup> mice. MMP-8 and IL-18 are pro-inflammatory markers associated with chronic obstructive pulmonary disease (COPD) (48, 49). As *N. brasiliensis* infection eventually results in emphysema (22) that resemble features  
370 of COPD, our data thus suggest a complex role for IL-13 in the development emphysema.

Given the attribution of IL-13 to tissue remodelling and fibrosis in a variety of contexts, we anticipated changes to the matrisome in our acute lung injury model using proteomic analysis. While we saw many changes to the lung matrisome due to infection in WT mice, we did not observe major changes in lung collagens in *Il13*<sup>-/-</sup> mice after infection.  
375 However, we saw that some major collagens (especially collagen I and III) were reduced in abundance following infection of WT mice. This reduction in the expression of these collagens did not occur in *Il13*<sup>-/-</sup> mice, which already had a baseline decrease in these collagens. It is thus possible that IL-13 has a developmental role in collagen organisation that predisposed the *Il13*<sup>-/-</sup> mice to enhanced tissue injury. A limitation of our matrisome analysis  
380 is that we did not account for potential changes in the localisation of specific collagen types

and cannot exclude a role for glycosylation state or other post-translational modifications.

Additionally, the precise timing of changes in the IL-13-dependent proteome are to be resolved since we observed both early (D2pi) and late (D6pi) effects in our model.

Nevertheless, our observation that *Il13*<sup>-/-</sup> mice had enhanced haemorrhaging lead us to

385 hypothesize that there may be compromised endothelial cell integrity (e.g. with respect to basement membrane collagen composition) during lung injury in the absence of IL-13. To the best of our knowledge, no prior study has shown a direct protective effect of IL-13 in mitigating airway haemorrhage, which warrants further investigation mechanistically.

390 Additionally, pathway analyses of the proteomic data predicted a dysregulation in protein synthesis and cellular stress pathways (presumably in epithelial cells) upon acute tissue injury in the absence of IL-13, which will be the subject of future studies.

In conclusion, our study has demonstrated a pivotal role for IL-13 in limiting tissue injury and airway bleeding and suggest broader functions for IL-13 in regulating type 2 immunity, in the context of acute lung damage.

395

## Materials and Methods

### Mice and ethics statements

WT C57BL/6J were purchased from Charles River UK. *III3<sup>tm3.1Anjm</sup>* (50) were maintained on a C57BL/6J background and bred in-house at the University of Manchester. Most  
400 experiments had a combination of purchased WT mice and littermate controls. Female and male mice were used at age 8-14 weeks old. Animals were housed in individually ventilated cages with food and water provided ad libitum. Experimental mice were randomly assigned to groups. All experiments were carried out in accordance with the United Kingdom Animals (Scientific Procedures) Act 1986 and under a Project License (70/8548) granted by the Home  
405 Office and approved by local Animal Ethics Review Group at the University of Manchester.

### *N. brasiliensis* infection

*N. brasiliensis* worms were propagated as previously described (51). Infective L3 larvae were isolated and mice were injected with 250 L3s subcutaneously. Mice were culled by overdose  
410 of pentobarbitone i.p. and BAL was performed with 10% FBS in PBS and lung lobes were collected. Perfusion was not performed due to the compromised lung vasculature during *N. brasiliensis* infection. On D2pi, BAL fluid absorbance was measured at 540 nm using a VersaMax microplate reader (Molecular Devices) to assess airway haemorrhage. Lung lobes were either stored in RNAlater (ThermoFisher), fixed in 10% neutral-buffered formalin for  
415 histology or minced and digested with Liberase TL (Roche) for 30 min at 37 °C for analysis of lung epithelial cells by flow cytometry and ex vivo stimulation of lung T cells using cell stimulation cocktail (plus protein transport inhibitors) (eBioscience). On D6pi, adult small intestinal worms were counted using a dissecting microscope following incubation of the small intestine at 37 °C to collect live adult worms that migrate out of the tissue.

420

## Flow cytometry

Single cell suspensions were washed in PBS and Live/Dead staining (ThermoFisher) was performed. Samples were Fc-blocked using  $\alpha$ -CD16/32 (2.4G2) (BD Biosciences) and mouse serum (BioRad). Blocking and subsequent surface staining was performed using PBS  
425 containing 2 mM EDTA, 2% FBS, and 0.05% NaN<sub>3</sub>. Antibodies used for staining are listed in **Table 1**. Following surface staining, cells were incubated with IC fixation buffer (ThermoFisher) prior to permeabilization for intracellular staining. For secondary detection of Ym1 and RELM- $\alpha$ , Zenon goat and rabbit antibody labels (ThermoFisher) were used. For  
RELM- $\alpha$  intracellular staining, cells were directly stained without stimulation or protein  
430 transport inhibition. Lung CD4<sup>+</sup> T cells were stimulated ex vivo with cell stimulation cocktail containing protein transport inhibitors (ThermoFisher) for 4 h at 37° C prior to staining. For cell quantification, some samples were spiked with 10  $\mu$ m polystyrene beads (Sigma-Aldrich) prior to acquisition. Data were acquired on a BD LSRFortessa flow cytometer and analysed using FlowJo v10 software.

435 **Table 1** List of flow cytometry antibodies used.

| <b>Antigen</b> | <b>Clone</b> | <b>Manufacturer</b> |
|----------------|--------------|---------------------|
| CD45.2         | 104          | BioLegend           |
| CD11b          | M1/70        | BioLegend           |
| CD11c          | N418         | BioLegend           |
| Ly6C           | HK1.4        | BioLegend           |
| Ly6G           | 1A8          | BD Biosciences      |
| Siglec-F       | E50-2440     | BD Biosciences      |
| TCR $\beta$    | H57-597      | BioLegend           |
| CD3 $\epsilon$ | 17A2         | ThermoFisher        |
| CD4            | GK1.5        | BioLegend           |
| CD8            | 53-6.7       | BioLegend           |
| CD19           | 6D5          | BioLegend           |
| B220           | RA3-6B2      | ThermoFisher        |
| EpCAM          | 9C4          | BioLegend           |
| CD31           | 390          | BioLegend           |
| IL-4           | 11B11        | BioLegend           |
| IL-5           | TRFK5        | BioLegend           |
| IL-13          | eBio13A      | ThermoFisher        |
| RELM- $\alpha$ | Polyclonal   | Peptotech           |

## RNA extraction and quantitative real-time PCR

Tissue samples stored in RNAlater (Thermo Fisher Scientific) were processed for RNA extraction using a TissueLyser II and QIAzol reagent (Qiagen). Isolated RNA was quantified using a Qubit fluorimeter and RNA BR kit (Qiagen). cDNA was synthesized using Tetro reverse transcription kit (Bioline) and oligo dT 15-mers (Integrated DNA Technologies). Quantitative real-time PCR was performed using SYBR green mix (Agilent Technologies) and a LightCycler 480 II (Roche). A list of primer sequences used are shown in **Table 2**. Gene expression levels were determined by second derivative maxima using standard curves (LightCycler software) and expressed relative to the housekeeping gene *Rpl13a*.

**Table 2** List of primer sequences used.

| Primer                | Sequence (5'-3')        |
|-----------------------|-------------------------|
| <i>I14</i> forward    | GAGAGATCATCGGCATTTTGA   |
| <i>I14</i> reverse    | TCTGTGGTGTTCCTTCGTTGC   |
| <i>I15</i> forward    | ACATTGACCGCCAAAAAGAG    |
| <i>I15</i> reverse    | CACCATGGAGCAGCTCAG      |
| <i>I113</i> forward   | CCTCTGACCCTTAAGGAGCTTAT |
| <i>I113</i> reverse   | CGTTGCACAGGGGAGTCT      |
| <i>Retnla</i> forward | TATGAACAGATGGGCCTCCT    |
| <i>Retnla</i> reverse | GGCAGTTGCAAGTATCTCCAC   |
| <i>Rpl13a</i> forward | CATGAGGTCGGGTGGAAGTA    |
| <i>Rpl13a</i> reverse | GCCTGTTTCCGTAACCTCAA    |

## Lung proteomic analysis

Samples from slides containing whole lung tissue sections were scraped excluding major blood vessels and processed as previously described (52). Peptides were evaluated by liquid chromatography coupled tandem mass spectrometry using an UltiMate® 3000 Rapid Separation LC system (Dionex Corporation) coupled to a Q Exactive HF mass spectrometer (ThermoFisher). Raw spectra were aligned using MAXQuant software v1.6.17.0 (53) with the variable modifications of proline and methionine oxidation in addition to “matched between runs” being enabled. Raw data was then imported into R for differential analysis with MSqRob (54) using the default pipeline. Heatmaps were plotted using scaled log<sub>10</sub>-

transformed LFQ counts. The mass spectrometry proteomics data have been deposited to the ProteomeXchange Consortium via the PRIDE (55) partner repository with the dataset  
460 identifier PXD021853.

### **Hydroxyproline assay**

Hydroxyproline assay was performed as previously described (56). Whole lungs were incubated overnight in 6 M HCl, in screw-top tubes at 100 °C covered with aluminium foil.  
465 Tubes were cooled to RT and centrifuged at 12,000 x g for 3 min. Hydroxyproline standards were prepared (starting at 0.25 mg/ml) and serially diluted with 6 M HCl. Samples and standards (50 µl) were transferred into Eppendorf tubes and 450 µl chloramine T reagent (55.79 mM chloramine T (initially dissolved in 50% N-propanol) in acetate citrate buffer — 0.88 M sodium acetate trihydrate, 294 mM citric acid, 1.2% glacial acetic acid, 0.85 M  
470 sodium hydroxide — adjusted to pH 6.5; reagents from Sigma) was added to each tube and incubated at RT for 25 min. Ehrlich's reagent (500 µl; 1 M 4-dimethylaminobenzaldehyde in N-propanol:perchloric acid (2:1), Sigma) was added to each tube and incubated at 65 °C for 10 min and absorbance at 558 nm was measured.

### **475 Histological and immunofluorescence staining**

Whole left lung lobes were paraffin embedded and 5 µm sections were prepared for haematoxylin/eosin or Masson's Trichrome staining. For visualisation of haemosiderin deposits, lung sections were rehydrated and stained with a solution of 5% potassium ferrocyanide with 10% HCl (Prussian blue) for 20 min; sections were then rinsed with dH<sub>2</sub>O  
480 and counterstained with a solution of 1% neutral red and 1% acetic acid for 5 min before being rinsed with dH<sub>2</sub>O and dehydrated for mounting. Brightfield images were captured using an Olympus slide scanner and analysed using CaseViewer software (3DHISTECH).

For immunofluorescence staining, lung sections were rehydrated and subjected to heat-mediated antigen retrieval using citrate buffer (10 mM sodium citrate, 0.05% Tween-20, pH 6.0) followed by primary antibody incubation overnight at 4 °C using biotin-anti-Ym1 and anti-RELM- $\alpha$  (**Table 1**); sections were then incubated with anti-rabbit FITC (Invitrogen) and streptavidin NL-557 (R&D systems) for 30 min RT before being mounting using Fluoromount-G containing DAPI (SouthernBiotech). Fluorescent slides were imaged using an EVOS™ FL Imaging System (ThermoFisher) and analysed using ImageJ.

490

### **Lung lacunarity analysis**

Slide-scanned images of H&E-stained lung lobes were processed in a KNIME software workflow to obtain 50 random regions of interests (ROIs) across the whole lung section. ROIs that contained lobe boundaries or extensive artefacts were excluded from the analysis. The ROIs were then converted to binary images and lacunarity was quantified using the FracLac plugin for ImageJ (default settings). Lacunarity values of all the ROIs were averaged to obtain estimates for the entire lobe.

495

### **ELISA**

BAL supernatants were analysed for RELM- $\alpha$  using commercially available ELISA kits (Peprotech). Analytes were detected using horse radish peroxidase-conjugated streptavidin and TMB substrate (BioLegend) and stopped with 1 M HCl. Final absorbance at 450 nm was measured using a VersaMax microplate reader (Molecular Devices).

500

### **IL-4-Fc and IL-13-Fc injections**

To extend the half-life of IL-4 and IL-13, fusion proteins were generated of mouse IL-4 and IL-13 with the Fc portion of IgG1 (custom order with Absolute Antibody). Mice were

injected intraperitoneally with either PBS, 10 µg IL-4-Fc, or 10 µg IL-13-Fc in 100 µl PBS.

In other experiments, mice were anaesthetised using isoflurane inhalation and intranasally  
510 instilled with either PBS, 10 µg IL-4-Fc, or 10 µg IL-13-Fc in 40 µl PBS. The following day  
at 18 h post-treatment, mice were culled for lung cell analysis by flow cytometry.

### **Nanostring analysis**

Quality control was performed on RNA samples with an Agilent 2200 TapeStation system  
515 prior to downstream analyses. Samples were diluted and 100 ng of RNA was processed for  
running on a Nanostring nCounter® FLEX system using the Myeloid Innate Immunity v2  
panel. Raw count data was imported into R for analysis using the limma package (57).

Internal housekeeping and negative control probes were used to ensure data integrity and set  
thresholds for minimum expression. Data was normalised using the edgeR package (58) and  
520 then differential expression was calculated using the limma package. Figures were generated  
in R using ggplot and the complexheatmap package. Heatmaps were plotted using scaled  
normalised counts.

### **Statistical analyses**

525 Graphpad Prism 8 software was used for all statistical analyses. Data were assessed to be  
normally distributed by the D'Agostino-Pearson omnibus normality test. Differences between  
experimental groups were assessed by ANOVA (for normally distributed data) followed by  
Tukey-Kramer *post hoc* multiple comparisons test or an unpaired two-tailed Student's *t* test.  
In cases where data were not normally distributed, a Kruskal-Wallis test was used. For gene  
530 expression data, values were log<sub>2</sub> transformed to achieve normal distribution. Comparisons  
with a *P* value of less than 0.05 were considered to be statistically significant.



## Acknowledgements

This work was supported by the Wellcome Trust (203128/Z/16/Z, 110126/Z/15/Z and  
535 106898/A/15/Z) and the Medical Research Council UK (MR/K01207X/2). TES was  
supported by Medical Research Foundation UK joint funding with Asthma UK (MRFAUK-  
2015-302). We thank Andrew McKenzie (Cambridge) for providing the *Il13<sup>tm3.1Anjm</sup>* mice.  
We further thank the Flow Cytometry, Bioimaging, Genomic Technologies, BioMS and  
Biological Services core facilities at the University of Manchester.

540

## Disclosure

The authors declare no competing interests.

## References

- 545 1. Finkelman, F. D., T. Shea-Donohue, S. C. Morris, L. Gildea, R. Strait, K. B. Madden, L. Schopf, and J. F. Urban. 2004. Interleukin-4- and interleukin-13-mediated host protection against intestinal nematode parasites. *Immunol. Rev.* 201: 139–155.
2. Shimokawa, C., T. Kanaya, M. Hachisuka, K. Ishiwata, H. Hisaeda, Y. Kurashima, H. Kiyono, T. Yoshimoto, T. Kaisho, and H. Ohno. 2017. Mast cells are crucial for induction of group 2 innate lymphoid cells and clearance of helminth infections. *Immunity* 46: 863-874.e4.
- 550 3. Evans, C. M., K. Kim, M. J. Tuvim, and B. F. Dickey. 2009. Mucus hypersecretion in asthma: causes and effects. *Curr. Opin. Pulm. Med.* 15: 4–11.
4. Corne, J., G. Chupp, C. G. Lee, R. J. Homer, Z. Zhu, Q. Chen, B. Ma, Y. Du, F. Roux, J. McArdle, A. B. Waxman, and J. A. Elias. 2000. IL-13 stimulates vascular endothelial cell growth factor and protects against hyperoxic acute lung injury. *J. Clin. Invest.* 106: 783–791.
- 555 5. Risse, P. A., T. Jo, F. Suarez, N. Hirota, B. Tolloczko, P. Ferraro, P. Grutter, and J. G. Martin. 2011. Interleukin-13 inhibits proliferation and enhances contractility of human airway smooth muscle cells without change in contractile phenotype. *Am. J. Physiol. - Lung Cell. Mol. Physiol.* 300: L958-66.
- 560 6. Gieseck, R. L., M. S. Wilson, and T. A. Wynn. 2018. Type 2 immunity in tissue repair and fibrosis. *Nat. Rev. Immunol.* 18: 62–76.
7. Karnele, E. P., T. S. Pasricha, T. R. Ramalingam, R. W. Thompson, R. L. Gieseck, K. J. Knilans, M. Hegen, M. Farmer, F. Jin, A. Kleinman, D. A. Hinds, T. Almeida Pereira, R. de Queiroz Prado, N. Bing, L. Tchistiakova, M. T. Kasaian, T. A. Wynn, and K. M. Vannella.
- 565 2019. Anti-IL-13R $\alpha$ 2 therapy promotes recovery in a murine model of inflammatory bowel disease. *Mucosal Immunol.* 12: 1174–1186.
8. Wills-Karp, M., and F. D. Finkelman. 2008. Untangling the complex web of IL-4- and IL-13-mediated signaling pathways. *Sci. Signal.* 1: pe55.
9. Bagnasco, D., M. Ferrando, G. Varricchi, G. Passalacqua, and G. W. Canonica. 2016. A critical evaluation of Anti-IL-13 and Anti-IL-4 strategies in severe asthma. *Int. Arch. Allergy Immunol.* 170: 122–131.
- 570 10. Castro, M., J. Corren, I. D. Pavord, J. Maspero, S. Wenzel, K. F. Rabe, W. W. Busse, L. Ford, L. Sher, J. M. FitzGerald, C. Katelaris, Y. Tohda, B. Zhang, H. Staudinger, G. Pirozzi, N. Amin, M. Ruddy, B. Akinlade, A. Khan, J. Chao, R. Martincova, N. M. H. Graham, J. D. Hamilton, B. N. Swanson, N. Stahl, G. D. Yancopoulos, and A. Teper. 2018. Dupilumab
- 575

- efficacy and safety in moderate-to-severe uncontrolled asthma. *N. Engl. J. Med.* 378: 2486–2496.
11. Elias, J. A., Z. Zhu, G. Chupp, and R. J. Homer. 1999. Airway remodeling in asthma. *J. Clin. Invest.* 104: 1001–1006.
- 580 12. Wynn, T. A. 2008. Cellular and molecular mechanisms of fibrosis. *J. Pathol.* 214: 199–210.
13. Doucet, C., D. Brouty-Boyé, C. Pottin-Clémenceau, G. W. Canonica, C. Jasmin, and B. Azzarone. 1998. Interleukin (IL) 4 and IL-13 act on human lung fibroblasts. Implication in asthma. *J. Clin. Invest.* 101: 2129–2139.
- 585 14. Kolodsick, J. E., G. B. Toews, C. Jakubzick, C. Hogaboam, T. A. Moore, A. McKenzie, C. A. Wilke, C. J. Chrisman, and B. B. Moore. 2004. Protection from Fluorescein Isothiocyanate-Induced Fibrosis in IL-13-Deficient, but Not IL-4-Deficient, Mice Results from Impaired Collagen Synthesis by Fibroblasts. *J. Immunol.* 172: 4068–4076.
15. Chun Geun Lee, R. J. Homer, Z. Zhu, S. Lanone, X. Wang, V. Kotliansky, J. M. Shipley, P. Gotwals, P. Noble, Q. Chen, R. M. Senior, and J. A. Elias. 2001. Interleukin-13 induces tissue fibrosis by selectively stimulating and activating transforming growth factor  $\beta$ 1. *J. Exp. Med.* 194: 809–821.
- 590 16. Chung, S. I., J. A. Horton, T. R. Ramalingam, A. O. White, E. J. Chung, K. E. Hudak, B. T. Scroggins, J. R. Arron, T. A. Wynn, and D. E. Citrin. 2016. IL-13 is a therapeutic target in radiation lung injury. *Sci. Rep.* 6: 39714.
- 595 17. Kaviratne, M., M. Hesse, M. Leusink, A. W. Cheever, S. J. Davies, J. H. McKerrow, L. M. Wakefield, J. J. Letterio, and T. A. Wynn. 2004. IL-13 activates a mechanism of tissue fibrosis that is completely TGF- $\beta$  independent. *J. Immunol.* 173: 4020–4029.
18. Gieseck, R. L., T. R. Ramalingam, K. M. Hart, K. M. Vannella, D. A. Cantu, W. Y. Lu, S. Ferreira-González, S. J. Forbes, L. Vallier, and T. A. Wynn. 2016. Interleukin-13 activates distinct cellular pathways leading to ductular reaction, steatosis, and fibrosis. *Immunity* 45: 145–158.
- 600 19. Wilson, M. S., S. K. Madala, T. R. Ramalingam, B. R. Gochuico, I. O. Rosas, A. W. Cheever, and T. A. Wynn. 2010. Bleomycin and IL-1 $\beta$ -mediated pulmonary fibrosis is IL-17A dependent. *J. Exp. Med.* 207: 535–552.
- 605 20. Reece, J. J., M. C. Siracusa, and A. L. Scott. 2006. Innate immune responses to lung-stage helminth infection induce alternatively activated alveolar macrophages. *Infect. Immun.* 74: 4970–4981.
21. Meng, F., and A. I. Alayash. 2017. Determination of extinction coefficients of human

- 610 hemoglobin in various redox states. *Anal. Biochem.* 521: 11–19.
22. Marsland, B. J., M. Kurrer, R. Reissmann, N. L. Harris, and M. Kopf. 2008. Nippostrongylus brasiliensis infection leads to the development of emphysema associated with the induction of alternatively activated macrophages. *Eur. J. Immunol.* 38: 479–488.
23. Chenery, A. L., R. Alhallaf, Z. Agha, J. Ajendra, J. E. Parkinson, M. M. Cooper, B. H. K. Chan, R. M. Eichenberger, L. A. Dent, A. A. B. Robertson, A. Kupz, D. Brough, A. Loukas, T. E. Sutherland, J. E. Allen, and P. R. Giacomin. 2019. Inflammasome-independent role for NLRP3 in controlling innate antihelminth immunity and tissue repair in the lung. *J. Immunol.* 203: 2724–2734.
- 615 24. Chen, F., Z. Liu, W. Wu, C. Rozo, S. Bowdridge, A. Millman, N. Van Rooijen, J. F. Urban, T. A. Wynn, W. C. Gause, and W. C. Gause. 2012. An essential role for TH2-type responses in limiting acute tissue damage during experimental helminth infection. *Nat. Med.* 18: 260–266.
25. Sutherland, T. E., N. Logan, D. Rückerl, A. A. Humbles, S. M. Allan, V. Papayannopoulos, B. Stockinger, R. M. Maizels, and J. E. Allen. 2014. Chitinase-like proteins promote IL-17-mediated neutrophilia in a tradeoff between nematode killing and host damage. *Nat. Immunol.* 15: 1116–1125.
- 625 26. Urban, J. F., N. Noben-Trauth, D. D. Donaldson, K. B. Madden, S. C. Morris, M. Collins, and F. D. Finkelman. 1998. IL-13, IL-4R $\alpha$ , and Stat6 are required for the expulsion of the gastrointestinal nematode parasite Nippostrongylus brasiliensis. *Immunity* 8: 255–264.
- 630 27. Mearns, H., W. G. C. Horsnell, J. C. Hoving, B. Dewals, A. J. Cutler, F. Kirstein, E. Myburgh, B. Arendse, and F. Brombacher. 2008. Interleukin-4-promoted T helper 2 responses enhance Nippostrongylus brasiliensis-induced pulmonary pathology. *Infect. Immun.* 76: 5535–5542.
28. Oeser, K., C. Schwartz, and D. Voehringer. 2015. Conditional IL-4/IL-13-deficient mice reveal a critical role of innate immune cells for protective immunity against gastrointestinal helminths. *Mucosal Immunol.* 8: 672–682.
- 635 29. Barner, M., M. Mohrs, F. Brombacher, and M. Kopf. 1998. Differences between IL-4R $\alpha$ -deficient and IL-4-deficient mice reveal a role for IL-13 in the regulation of Th2 responses. *Curr. Biol.* 8: 669–672.
- 640 30. McKenzie, G. J., C. L. Emson, S. E. Bell, S. Anderson, P. Fallon, G. Zurawski, R. Murray, R. Grencis, and A. N. McKenzie. 1998. Impaired development of Th2 cells in IL-13-deficient mice. *Immunity* 9: 423–432.
31. Naba, A., K. R. Clauser, S. Hoersch, H. Liu, S. A. Carr, and R. O. Hynes. 2012. The

- 645 matrisome: In silico definition and in vivo characterization by proteomics of normal and  
tumor extracellular matrices. *Mol. Cell. Proteomics* 11: M111.014647.
32. Sutherland, T. E., D. Rückerl, N. Logan, S. Duncan, T. A. Wynn, and J. E. Allen. 2018.  
Ym1 induces RELM $\alpha$  and rescues IL-4R $\alpha$  deficiency in lung repair during nematode  
infection. *PLOS Pathog.* 14: e1007423.
33. Thawer, S., J. Auret, C. Schnoeller, A. Chetty, K. Smith, M. Darby, L. Roberts, R. M.  
650 Mackay, H. J. Whitwell, J. F. Timms, J. Madsen, M. E. Selkirk, F. Brombacher, H. W. Clark,  
and W. G. C. Horsnell. 2016. Surfactant protein-D is essential for immunity to helminth  
infection. *PLoS Pathog.* 12: e1005461.
34. Kim, L. K., R. Morita, Y. Kobayashi, S. C. Eisenbarth, C. G. Lee, J. Elias, E. E. Eynon,  
and R. A. Flavell. 2015. AMCcase is a crucial regulator of type 2 immune responses to inhaled  
655 house dust mites. *Proc. Natl. Acad. Sci. U. S. A.* 112: E2891–E2899.
35. Knipper, J. A., S. Willenborg, J. Brinckmann, W. Bloch, T. Maaß, R. Wagener, T. Krieg,  
T. Sutherland, A. Munitz, M. E. Rothenberg, A. Niehoff, R. Richardson, M. Hammerschmidt,  
J. E. Allen, and S. A. Eming. 2015. Interleukin-4 receptor  $\alpha$  signaling in myeloid cells  
controls collagen fibril assembly in skin repair. *Immunity* 43: 803–816.
- 660 36. Sutherland, T. E., D. Rückerl, N. Logan, S. Duncan, T. A. Wynn, and J. E. Allen. 2018.  
Ym1 induces RELM $\alpha$  and rescues IL-4R $\alpha$  deficiency in lung repair during nematode  
infection. *PLOS Pathog.* 14: e1007423.
37. Krljanac, B., C. Schubart, R. Naumann, S. Wirtz, S. Culemann, G. Krönke, and D.  
Voehringer. 2019. RELM $\alpha$ -expressing macrophages protect against fatal lung damage and  
665 reduce parasite burden during helminth infection. *Sci. Immunol.* 4: 3814.
38. Wan, H., K. H. Kaestner, S. L. Ang, M. Ikegami, F. D. Finkelman, M. T. Stahlman, P. C.  
Fulkerson, M. E. Rothenberg, and J. A. Whitsett. 2004. Foxa2 regulates alveolarization and  
goblet cell hyperplasia. *Development* 131: 953–964.
39. McKenzie, G. J., A. Bancroft, R. K. Grencis, and A. N. J. McKenzie. 1998. A distinct  
670 role for interleukin-13 in Th2-cell-mediated immune responses. *Curr. Biol.* 8: 339–342.
40. Kumar, R. K., C. Herbert, M. Yang, A. M. L. Koskinen, A. N. J. McKenzie, and P. S.  
Foster. 2002. Role of interleukin-13 in eosinophil accumulation and airway remodelling in a  
mouse model of chronic asthma. *Clin. Exp. Allergy* 32: 1104–1111.
41. Munitz, A., E. B. Brandt, M. Mingler, F. D. Finkelman, and M. E. Rothenberg. 2008.  
675 Distinct roles for IL-13 and IL-4 via IL-13 receptor  $\alpha$ 1 and the type II IL-4 receptor in  
asthma pathogenesis. *Proc. Natl. Acad. Sci. U. S. A.* 105: 7240–7245.
42. Bao, K., and R. L. Reinhardt. 2015. The differential expression of IL-4 and IL-13 and its

- impact on type-2 immunity. *Cytokine* 75: 25–37.
43. LaPorte, S. L., Z. S. Juo, J. Vaclavikova, L. A. Colf, X. Qi, N. M. Heller, A. D. Keegan,  
680 and K. C. Garcia. 2008. Molecular and structural basis of cytokine receptor pleiotropy in the  
interleukin-4/13 system. *Cell* 132: 259–272.
44. White, S. R., L. D. Martin, R. Stern, B. Laxman, and B. A. Marroquin. 2010. Expression  
of IL-4/IL-13 receptors in differentiating human airway epithelial cells. *Am. J. Physiol. Lung  
Cell. Mol. Physiol.* 299: L681-93.
- 685 45. Zhen, G., S. W. Park, L. T. Nguyenvu, M. W. Rodriguez, R. Barbeau, A. C. Paquet, and  
D. J. Erle. 2007. IL-13 and epidermal growth factor receptor have critical but distinct roles in  
epithelial cell mucin production. *Am. J. Respir. Cell Mol. Biol.* 36: 244–253.
46. Park, S. W., C. Verhaeghe, L. T. Nguyenvu, R. Barbeau, C. J. Easley, Y. Nakagami, X.  
Huang, P. G. Woodruff, J. V. Fahy, and D. J. Erle. 2009. Distinct roles of FOXA2 and  
690 FOXA3 in allergic airway disease and asthma. *Am. J. Respir. Crit. Care Med.* 180: 603–610.
47. Chen, G., H. Wan, F. Luo, L. Zhang, Y. Xu, I. Lewkowich, M. Wills-Karp, and J. A.  
Whitsett. 2010. Foxa2 programs Th2 cell-mediated innate immunity in the developing lung.  
*J. Immunol.* 184: 6133–6141.
48. Ilumets, H., P. Ryttilä, I. Demedts, G. G. Brusselle, A. Sovijärvi, M. Myllärniemi, T.  
695 Sorsa, and V. L. Kinnula. 2007. Matrix metalloproteinases -8, -9 and -12 in smokers and  
patients with Stage 0 COPD. *Int. J. COPD* 2: 369–379.
49. Imaoka, H., T. Hoshino, S. Takei, T. Kinoshita, M. Okamoto, T. Kawayama, S. Kato, H.  
Iwasaki, K. Watanabe, and H. Aizawa. 2008. Interleukin-18 production and pulmonary  
function in COPD. *Eur. Respir. J.* 31: 287–297.
- 700 50. Neill, D. R., S. H. Wong, A. Bellosi, R. J. Flynn, M. Daly, T. K. A. Langford, C. Bucks,  
C. M. Kane, P. G. Fallon, R. Pannell, H. E. Jolin, and A. N. J. McKenzie. 2010. Nuocytes  
represent a new innate effector leukocyte that mediates type-2 immunity. *Nature* 464: 1367–  
1370.
51. Lawrence, R. A., C. A. Gray, J. Osborne, and R. M. Maizels. 1996. *Nippostrongylus*  
705 *brasiliensis*: cytokine responses and nematode expulsion in normal and IL-4-deficient mice.  
*Exp. Parasitol.* 84: 65–73.
52. Herrera, J. A., V. Mallikarjun, S. Rosini, M. A. Montero, C. Lawless, S. Warwood, R.  
O’Cualain, D. Knight, M. A. Schwartz, and J. Swift. 2020. Laser capture microdissection  
coupled mass spectrometry (LCM-MS) for spatially resolved analysis of formalin-fixed and  
710 stained human lung tissues. *Clin. Proteomics* 17: 24.
53. Cox, J., and M. Mann. 2008. MaxQuant enables high peptide identification rates,

- individualized p.p.b.-range mass accuracies and proteome-wide protein quantification. *Nat. Biotechnol.* 26: 1367–1372.
54. Goeminne, L. J. E., K. Gevaert, and L. Clement. 2018. Experimental design and data-  
715 analysis in label-free quantitative LC/MS proteomics: A tutorial with MSqRob. *J. Proteomics*  
171: 23–36.
55. Perez-Riverol, Y., A. Csordas, J. Bai, M. Bernal-Llinares, S. Hewapathirana, D. J. Kundu, A. Inuganti, J. Griss, G. Mayer, M. Eisenacher, E. Pérez, J. Uszkoreit, J. Pfeuffer, T. Sachsenberg, Ş. Yilmaz, S. Tiwary, J. Cox, E. Audain, M. Walzer, A. F. Jarnuczak, T.  
720 Ternent, A. Brazma, and J. A. Vizcaíno. 2019. The PRIDE database and related tools and  
resources in 2019: Improving support for quantification data. *Nucleic Acids Res.* 47: D442–  
D450.
56. Chang, J., R. Garva, A. Pickard, C. Y. C. Yeung, V. Mallikarjun, J. Swift, D. F. Holmes,  
B. Calverley, Y. Lu, A. Adamson, H. Raymond-Hayling, O. Jensen, T. Shearer, Q. J. Meng,  
725 and K. E. Kadler. 2020. Circadian control of the secretory pathway maintains collagen  
homeostasis. *Nat. Cell Biol.* 22: 74–86.
57. Ritchie, M. E., B. Phipson, D. Wu, Y. Hu, C. W. Law, W. Shi, and G. K. Smyth. 2015.  
limma powers differential expression analyses for RNA-sequencing and microarray studies.  
*Nucleic Acids Res.* 43: e47–e47.
- 730 58. Robinson, M. D., D. J. McCarthy, and G. K. Smyth. 2009. edgeR: A Bioconductor  
package for differential expression analysis of digital gene expression data. *Bioinformatics*  
26: 139–140.

## Supplemental figures

735

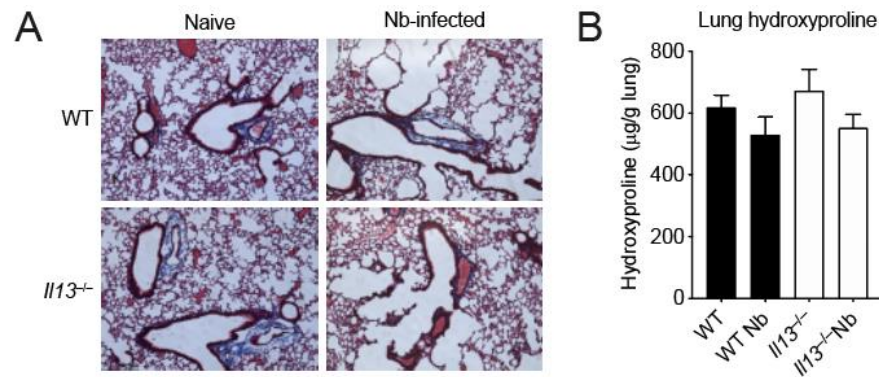

**Figure S1** Analysis of total collagen in the lungs of *Il13*<sup>-/-</sup> mice after *N. brasiliensis* infection on D6pi. **(A)** Lung sections were prepared and stained with Masson's trichrome Stain and imaged to visualise collagen. **(B)** Hydroxyproline levels from whole lungs were measured. Data are representative **(A)** or pooled (mean  $\pm$  SEM in **B**) from 2 individual experiments with 4-5 mice per group (per experiment).

740

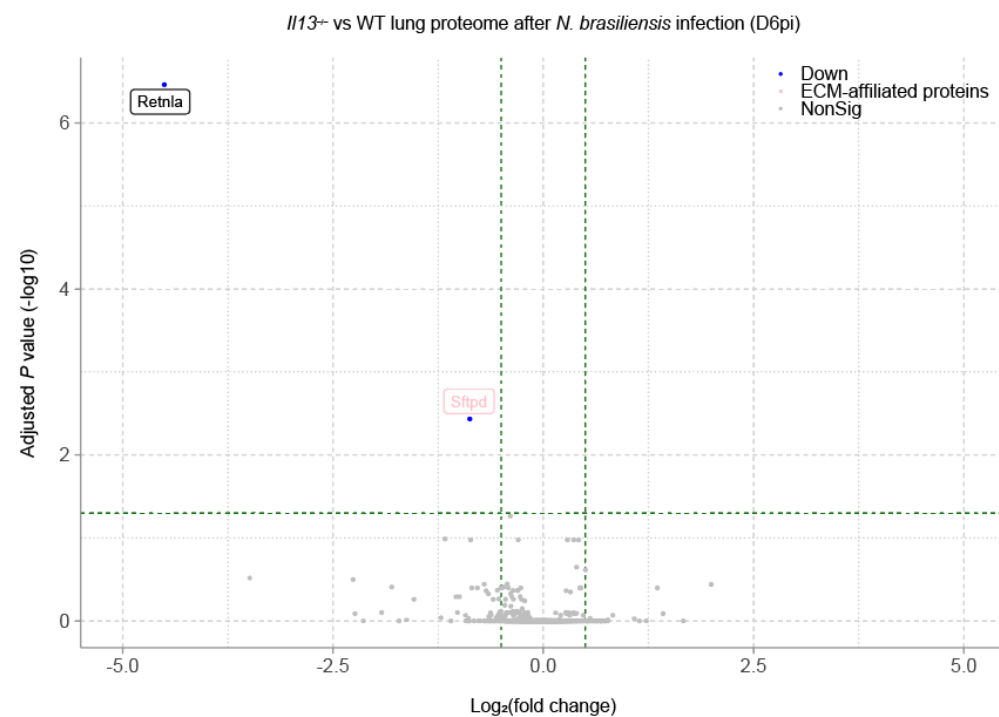

**Figure S2** Volcano plot of differentially expressed proteins (by adjusted *P* value) in the lungs of *N. brasiliensis*-infected *Il13*<sup>-/-</sup> mice compared to infected WT mice on D6pi.

745
